1 **Inhibition of broomrape germination by 2,4-diacetylphloroglucinol**  
2 **produced by environmental *Pseudomonas*.**

3  
4 **Authors and affiliations:**

5 Tristan Lurthy<sup>1#</sup>, Ségolène Perot<sup>1</sup>, Florence Gerin-Eveillard<sup>1</sup>, Marjolaine Rey<sup>1</sup>, Florence  
6 Wisniewski-Dyé<sup>1</sup>, Jordan Vacheron<sup>2##</sup> & Claire Prigent-Combaret<sup>1##</sup>

7  
8 <sup>1</sup> Ecologie Microbienne, Université Claude Bernard Lyon1, Université de Lyon, CNRS UMR-  
9 5557, INRAe UMR-1418, VetAgro Sup, 43 Boulevard du 11 Novembre 1918, 69622  
10 Villeurbanne, France.

11 <sup>2</sup> Department of Fundamental Microbiology, University of Lausanne, Lausanne, Switzerland.

12 \*: co-senior authors

13 #: **Corresponding authors:** [tristan.lurthy@univ-lyon1.fr](mailto:tristan.lurthy@univ-lyon1.fr), [Jordan.Vacheron@unil.ch](mailto:Jordan.Vacheron@unil.ch),  
14 [claire.prigent-combaret@univ-lyon1.fr](mailto:claire.prigent-combaret@univ-lyon1.fr)

15  
16  
17 **Running title:** DAPG-producing *Pseudomonas* inhibit the germination of broomrapes.

18  
19 **Keywords:** Environmental *Pseudomonas*, 2,4-diacetylphloroglucinol, DAPG, broomrape,  
20 *Phelipanche* sp., *Orobanche* sp., parasitic weeds.

21  
22  
23 **Conflict of interest:**

24 The authors declare no conflict of interest.

25

## 26 **Abstract**

27           Phloroglucinol compounds (PGCs) produced by environmental *Pseudomonas* are well  
28 known for their capacity to limit plant-pathogen infection. Although PGCs and more specifically  
29 2,4-diacetylphloroglucinol (DAPG) are well studied for their antimicrobial properties, they are  
30 to some extent toxic for crop plants. Parasitic weeds such as broomrapes (*Phelipanche ramosa*  
31 and *Orobancha cumana*) cause severe damage to crops and their development must be  
32 controlled. Here, we assessed the potential herbicidal effect of the bacterial model  
33 *Pseudomonas ogarae* F113, a PGCs-producing bacterium, on parasitic weed germination. We  
34 show using a mutagenesis approach that PGCs produced in bacterial supernatants are the  
35 main determinant inhibiting the germination of broomrapes. The use of individual or cocktails  
36 of pure PGCs revealed that the inhibition of the germination depends on the PGCs molecular  
37 structure and their concentrations as well as the broomrape species and pathovars.  
38 Furthermore, the inhibition caused by the PGCs is irreversible, causing a brown coloration of  
39 the broomrape seeds. Then, we evaluated in non-sterile soils the ability of bacterial inoculants  
40 or chemical DAPG to limit the infection of broomrapes on oil seed rape. Only the inoculation  
41 of PGCs-producing bacteria limited the infection of *P. ramosa*. Moreover, elemental profiling  
42 analysis of oil seed rape revealed that neither the inoculant nor applied DAPG affected the  
43 nutrition capacity of the oil seed rape. Our study expands the knowledge on the role that these  
44 multi-talented plant-beneficial *Pseudomonas* play in the environment and open new avenues  
45 for the development of natural bioherbicides to ward off parasitic plant infection.  
46

## 47 Introduction

48 Broomrapes are parasitic plants causing significant damage to different crops in  
49 agroecosystems [1]. They belong to the *Orobanche* and *Phelipanche* genera from the  
50 *Orobanchaceae* family [2, 3]. These parasitic plants are obligate root holoparasites, entirely  
51 dependent on their host plant to survive as they are not capable of photosynthesis [4]. Indeed,  
52 these parasitic plants obtain all the resources they need while maintaining their host alive for  
53 accomplishing their entire life cycle [5, 6]. The seed germination and haustorium formation are  
54 specifically induced by allelochemical signals such as strigolactones released from the host  
55 roots [7]. The activity spectrum of these parasitic plants can be either specific (e.g., *Orobanche*  
56 *cumana* which can only parasitize sunflower) or generalist (e.g., *Phelipanche ramosa* able to  
57 parasitize hemp (*Cannabis sativa*), tobacco (*Nicotiana tabacum*), and oilseed rape (*Brassica*  
58 *napus*)) [1, 5]. Broomrapes produce a large number of small seeds (less than 3 mm) that can  
59 survive in soil for several decades. This constitute the main problem to constrain their  
60 deleterious impact on crops [8]. The survival of the seeds depends on various abiotic factors  
61 (pH, humidity, climate) [9] and biotic factors (host plants, soil and rhizosphere microbiota; [6,  
62 10–12]. Different agricultural strategies attempt to regulate broomrape populations in  
63 agroecosystems, such as crop rotation, triggering the suicidal-germination of the plant parasitic  
64 seeds or the use of resistant host plant varieties or chemical herbicides [5]. However, biological  
65 control solutions are emerging to limit broomrape infestation, including the use of  
66 microorganisms [5, 13]. Indeed, several microorganisms inhibit the germination of different  
67 broomrape species, including, among others, *Fusarium oxysporum* [14], *Azospirillum*  
68 *brasilense* [15] or *Pseudomonas fluorescens* [16]. Although the use of microorganisms  
69 represents a promising alternative to ward off parasitic plants, their mode of action as well as  
70 the identification of the metabolites responsible of their inhibition effect remains often  
71 uncharted.

72 Several environmental *Pseudomonas* are well known as plant-colonizing bacteria [17].  
73 These *Pseudomonas* usually display a large arsenal of secondary metabolites encoded within  
74 their genomes that act on plant health and development [18, 19]. Among these metabolites,  
75 2,4-diacetylphloroglucinol (DAPG) has been studied notably for its role in plant protection.  
76 DAPG and its biosynthetic intermediates, phloroglucinol (PG) and monoacetylphloroglucinol  
77 (MAPG) are the main phloroglucinol compounds (PGCs) produced by *Pseudomonas*  
78 belonging to the *P. protegens* and *P. corrugata* subgroups [20]. The production of DAPG relies  
79 on the presence of the *phl* gene cluster composed out of nine genes [21, 22]. The initiation of  
80 the synthesis of PG from malonyl-CoA is mediated by *phlD* encoding a polyketide synthase,  
81 while *phlABC* encode for enzymes implicated into the transformation of PG to MAPG and  
82 subsequently to DAPG. The transformation of MAPG to DAPG is reversible through a

83 hydrolase encoded by *phlG*. The remaining genes, *phlF/phlH* and *phlE*, are involved in the  
84 regulation as well as the secretion of these PGCs, respectively. The production of PGCs by  
85 *Pseudomonas* is influenced by environmental factors including carbon sources [23] or specific  
86 metabolites found in the root exudates such as flavonoids, apigenin and phloretin [24].

87 In addition to having been studied for its role in plant pathogen suppression, DAPG acts  
88 as a signal molecule affecting gene expression of plant-beneficial traits in other  
89 microorganisms. Indeed, DAPG was described as an inducer of the production of PGCs and  
90 a repressor the production of pyoluteorin in other *Pseudomonas* [25, 26]. Moreover, DAPG  
91 produced by *Pseudomonas* also activates the expression of genes involved in the production  
92 of auxins by *Azospirillum baldaniorum* Sp245, another plant-beneficial microorganism [27].  
93 Since PGC-producing *Pseudomonas* are residing in the vicinity of or on plant roots, PGCs  
94 produced diffuse and also interact directly with plant root cells. Thus, it was shown that DAPG  
95 elicited the plant induced systemic resistance (ISR), protecting partially the plant leaves from  
96 the oomycete *Peronospora parasitica* [28, 29]. On the root part, the addition of DAPG triggered  
97 a massive increase of the efflux of amino acids by plant root cells [30]. It was also demonstrated  
98 that DAPG modulates auxin-dependent plant signaling pathway leading to significant  
99 modifications of plant root development [31–33]. Moreover, following an exposition of DAPG,  
100 the germination as well as the development of different crop plants were severely impacted  
101 [31, 34, 35]. Nevertheless, this herbicidal effect remains variable according to the plant species  
102 and was observed following the exposure of high concentrations that do not reflect those  
103 produced *in vivo*.

104 In this study, we aimed to investigate the impact of PGCs on the germination of the two  
105 main parasitic plants, *Phelipanche* and *Orobanche*. To evaluate the herbicidal effects of these  
106 PGCs, we have investigated the inhibitory effect of PGCs-producing strains and pure  
107 molecules in different *in vitro* and *in planta* experimental systems. First, the impact of the PGCs  
108 producing strain *Pseudomonas ogarae* F113 and its mutants, a PGC-deficient and PGC  
109 overproducers, have been studied on broomrape germination by applying culture  
110 supernatants. Then, the role of PGCs on the germination of four different broomrapes was  
111 assessed at different concentrations under *in vitro* experiment. Finally, we evaluated the ability  
112 of PGCs-producing bacteria and DAPG application to protect oilseed rape against broomrape  
113 in greenhouse.

114

## 115 **Materials and methods**

### 116 **Bacterial strains and media**

117 We used the plant-beneficial model strain *Pseudomonas ogarae* F113 (formerly named  
118 *P. fluorescens* F113 and *P. kilonensis* F113) [23] and several of its mutants [33]. The bacterial

119 strains used in this study as well as their characteristics are listed in **Supplementary Table 1**.  
120 The different bacterial strains were incubated at 28°C in King's B [36] medium or in a modified  
121 AB medium (ABm) supplemented with gentamycin (15 µg.mL<sup>-1</sup> when necessary) to maintain  
122 plasmid pBBR1-MCS5-*phlD*. ABm was composed of salts [MgSO<sub>4</sub> (1.2 mM), CaCl<sub>2</sub> (70 µM),  
123 NH<sub>4</sub>Cl (18 mM), KCl (2 mM), FeSO<sub>4</sub> (9 µM)], a phosphate buffer diluted ten-fold containing  
124 K<sub>2</sub>HPO<sub>4</sub> (1.725 mM) and NaH<sub>2</sub>PO<sub>4</sub> (960 µM) and fructose (20 mM) as carbon source.

125

## 126 **Plant material**

127 Seeds of *Phelipanche ramosa* were collected in France as described in Huet et al. 2020  
128 on winter oilseed rape (*Phelipanche ramosa* pv. oilseed rape), tobacco (*Phelipanche ramosa*  
129 pv. tobacco) and hemp (*Phelipanche ramosa* pv. hemp). Seeds of *Orobancha cumana* that  
130 parasites sunflower were provided by Terres Inovia in 2016. Seeds of *Brassica napus* cultivar  
131 AMAZZONITE (broomrape-sensitive) were provided by the breeder companies RAGT 2n  
132 (France).

133

## 134 **Chemicals**

135 The germination of broomrape seeds was triggered using the synthetic strigolactone  
136 analogue GR24 (Chiralix, Nijmegen, NL). It was first suspended in acetone (4.79 mg.mL<sup>-1</sup>),  
137 then diluted at 10 µM with a phosphate buffer (1 mM sodium-potassium phosphate buffer at  
138 pH 7.5).

139 Phloroglucinol (PG, Sigma-Aldrich), mono-acetyl-phloroglucinol (MAPG, Cayman  
140 Chemical), 2,4-diacetyl-phloroglucinol (DAPG, ChemCruz) and tri-acetyl-phloroglucinol  
141 (TAPG, Santa Cruz Biotechnology) were suspended in methanol (20 mM). These solutions  
142 were diluted with 1 mM phosphate buffer to obtain different stock solutions at different  
143 concentrations (66.60, 33.30, 16.65, 8.33, 4.16 µM). As methanol might have an effect on the  
144 germination of broomrapes, the final concentration was adjusted to 0.33% in all these stock  
145 solutions to prevent an effect of the dilution.

146

## 147 **Quantification of phloroglucinol compounds produced in bacterial supernatants**

148 The quantification of PGCs was conducted on 1.5 mL of bacterial culture supernatants  
149 for each condition. First, supernatants were lyophilized (Martin Christ Alpha 1-4 LSC,  
150 Osterode, Germany) prior solid/liquid extraction with methanol. Samples were sonicated 20  
151 min, then centrifuged for 20 minutes at 15 000 g and the supernatants recovered. The  
152 extraction protocol was repeated, leading to a total extracted volume of 3 mL per sample. The  
153 organic phase (methanol) was dried using a SpeedVac (Centrivap Cold Trap Concentrator;  
154 LABCONCO Co., MO, USA). Dried extracts were suspended in 200 µL of methanol and  
155 centrifuged for 5 min at 12 000 g to pellet the remaining solid phase.

156 Two hundred microliters of the supernatant were then transferred into vials and were  
157 proceeded for ultra-high pressure liquid chromatography coupled with UV (UHPLC-UV)  
158 analysis, as described in Rieusset et al. [42]. Chromatograms were analysed with MassHunter  
159 Qualitative Analysis B.07.00 software (Agilent Technologies®) and the quantification of DAPG  
160 and other PGCs was done according to a standard curve with commercial PGCs.

161

### 162 **Inhibition of broomrape germination *in vitro***

163 Broomrape seeds were surface-disinfected according to [37] with minor modifications.  
164 Briefly, broomrape seeds were soaked 5 min in a bleach solution (9.6% active chlorine) and  
165 then washed 5 times with sterile water. After washing, 1 mM phosphate buffer supplemented  
166 with plant agar 0.1% and PPM 0.2% (Plant Preservative Mixture; Plant Cell Technology) was  
167 added to obtain a density of approximately 2000 seeds.mL<sup>-1</sup>. These solutions containing the  
168 seeds were conditioned in sealed tubes for 10 days at 21°C in the dark in a cooled incubator  
169 (LMS, model 120, Kent, UK). The supernatant of conditioned seeds was removed and replaced  
170 by fresh phosphate buffer supplemented with plant agar 0.1% and PPM 0.2%. Fifteen  
171 microliters of this seed suspension were distributed in a 96-well plate (Cellstar®; Greiner Bio-  
172 One, France), corresponding to approximately 30 seeds per well. Then, 10 µL of GR24  
173 solution were then added in each well (final concentration of 1 µM). Seventy-five microliters of  
174 either bacterial supernatants (3-fold diluted) or cocktails or individual PGCs were added to  
175 obtain a final volume of 100 µL per well. For the addition of PGCs, the 75 µL were taken from  
176 the different stock solutions described above to obtain final concentrations of 50, 25, 12.5, 6.25  
177 and 3.125 µM. Negative controls were realized using 75 µL of fresh ABm medium fructose 20  
178 mM for supernatant (3-fold diluted) or phosphate buffer with 0.33% of methanol. After 10 days  
179 of incubation at 21°C in the dark, the percentage of broomrape germinated seeds was counted  
180 under a binocular (Leica, Switzerland) using the software Zen 2.3.

181

### 182 **Greenhouse experiments**

183 *Brassica napus* plants were grown on a soil mix containing 1/3 of a natural loamy soil  
184 collected at the experimental farm in La Côte-St-André (France; 16.2% clay, 43.9% silt and  
185 39.9% sand, pH 7.0, in water; 2.1% organic matter [38], 1/3 of vermiculite and 1/3 of TS3 peat-  
186 based substrate (Klasmann-Deilmann GmbH, Geeste, Germany). The humidity of the soil mix  
187 was maintained at 70% of field capacity. Each pot was filled with 1 liter of free-broomrape soil  
188 mix and then further filled with another liter of soil mix contaminated with non-disinfected seeds  
189 of *Phelipanche ramosa* pv. oilseed rape leading to a final density of 3.9 mg of seeds per pot  
190 corresponding to approximately 300 seeds per liter of soil. Seeds of *Brassica napus* cultivar  
191 AMAZZONITE were sown in pot after being pre-germinated 24h in the dark at 21°C in Petri  
192 dish containing water-soaked Whatman paper.



193 Two experiments were performed under greenhouse conditions. The first one was the  
194 inoculation of F113 and its mutant impaired in the production of PGCs ( $\Delta phlD$ ). The different  
195 bacterial strains were cultured 24h in King's B medium at 28°C. The bacteria were centrifuged  
196 at 4500 rpm during 10 min and washed with a  $MgSO_4$  10 mM solution before being adjusted  
197 to a bacterial concentration of  $2 \cdot 10^6$  CFU.mL<sup>-1</sup>. Five milliliters of these bacterial suspensions  
198 were sprayed at the base of the plant stem. Five milliliters of a  $MgSO_4$  10 mM solution were  
199 applied as non-inoculated control. The second experiment was the application of DAPG. Five  
200 milliliters of a solution concentrated at 50  $\mu$ M or 250  $\mu$ M were applied respecting the same  
201 amount of MeOH solvent of 1.25% (e.g. 10 mL of solution DAPG 250  $\mu$ M = 125  $\mu$ L solution  
202 DAPG 20mM + 9.875 mL of 1 mM phosphate buffer pH 7.5). The control condition without  
203 DAPG corresponds to the application of 5 mL of 1 mM phosphate buffer pH 7.5 containing  
204 1.25% of methanol.

205 Twenty pots per conditions were used for the inoculation of bacteria while 10 pots per  
206 conditions were used for the DAPG experiment. The shoot and root dry biomasses of *B. napus*  
207 were measured at the end of the experiment after 3 days at 70 °C in an oven. The experiment  
208 was conducted under controlled conditions with a 16h light and 8h dark photoperiod, at 25°C  
209 with 50-70% relative humidity in a greenhouse for 50 days. Treatments were applied twice  
210 during the experiment. The first application was performed when *B. napus* had between 2 to 4  
211 leaves. The second application was done at 6 to 8 leaves.

212

### 213 **Elemental profiling analysis of *B. napus***

214 After 50 days, dry samples from shoot of rapeseed from greenhouse experiment were  
215 ground into fine powder using a metal ball in a 50 mL plastic tube. For the elemental profiling  
216 analysis, 5 independent samples of 4 plants for strains-inoculation and of 2 plants for DAPG-  
217 treatment were collected. The concentrations of 17 elements (Na, Mo, Cd, Be, B, Mg, P, S,  
218 Ca, Mn, Fe, Co, Ni, Cu, Zn and K) were measured by High Resolution Inductively Coupled  
219 Plasma Mass Spectrometry (HR ICP-MS, Thermo Scientific, Element 2TM, Bremen, Germany)  
220 as described in Lurthy et al. [39].

221

### 222 **Data processing and statistical analysis**

223 Data were analysed using R studio (v.4.2.1) and considered significantly different when  
224 p-value < 0.05. The data were assessed for Normal distribution and variance homogeneity  
225 using Shapiro-Wilk tests and Bartlett tests respectively. When these parameters were  
226 respected, we performed ANOVA coupled with either HSD-Tukey test (more than 3 conditions  
227 to compare) or LSD-Fisher test (3 conditions to compare). Otherwise, Kruskal-Wallis tests  
228 applying Bonferroni correction were used to detect differences between conditions. A two-way

229 ANOVA was performed to assess the effect of the different variable tested, such as the effect  
230 of the pathovar and / or the PGCs applied on broomrape seed germination.  
231



## 232 Results

### 233 The DAPG produced by *Pseudomonas* contributes to the inhibition of the germination 234 of *Phelipanche ramosa* in vitro

235 We tested the ability of *Pseudomonas ogarae* F113, a PGC-producing *Pseudomonas*,  
236 to inhibit the germination of four different broomrapes selected according to their host  
237 specificity, their parasitism cycle and their associated microbiota [10]: *P. ramosa* pv.  
238 oilseed rape, *O. cumana* sunflower, *P. ramosa* pv. tobacco and *P. ramosa* pv. hemp.

239 We first determined the concentration of four different PGCs (PG, MAPG, DAPG and  
240 TAPG, **Figure 1B**) by UHPLC-UV in the supernatant of *P. ogarae* F113 wild type (F113) as  
241 well as in the supernatants of a mutant impaired in the production of DAPG ( $\Delta phlD$ ), a  
242 complemented mutant ( $\Delta phlD$  Comp.) and a strain engineered to overexpress the gene *phlD*  
243 (Over *phlD*) involved in the production of PG, the precursor of the DAPG (**Figure 1A**). Three  
244 out of the four different PGCs measured (PG, MAPG and DAPG) were detected in all  
245 supernatants, except in the supernatant of  $\Delta phlD$  (**Figure 1B**). The concentration of DAPG in  
246 the supernatant of the complemented and the overproducing strains were in the same order  
247 of magnitude than F113. However,  $\Delta phlD$  Comp. and Over *phlD* accumulated between 10 to  
248 20 times more PG and MAPG in their supernatants than F113. Finally, TAPG was not detected  
249 in any of the bacterial supernatants (**Figure 1B**).

250 Then, we tested the capacity of the different bacterial supernatants to inhibit the  
251 germination of the different broomrapes (**Figure 1C**). We observed that the supernatant of  
252 F113 reduced the germination rate of all broomrapes tested (from 28% to 55%). However, the  
253 supernatant of  $\Delta phlD$  did not inhibit the germination rate and appears, on the contrary, to  
254 slightly promote it compared to the control (>100%) (**Figure 1C**). The highest inhibition of the  
255 germination was observed with the supernatants of the complemented and the overproducing  
256 strains (**Figure 1C**). Furthermore, the sensitivity to the bacterial supernatants is different  
257 according to the broomrape tested (e.g., *P. ramosa* pv. tobacco being more-inhibited by the  
258 supernatant of F113 than *P. ramosa* pv. oil seed rape) (**Supplementary Figure 1**).

### 260 Each PGC contributes differentially to the inhibition of broomrape germination

261 To assess the contribution of the PGCs detected in bacterial supernatants on  
262 broomrape germination, we composed three different cocktails made of commercially available  
263 PGCs, mimicking the proportions detected in the supernatants of the different F113 derivatives  
264 (**Figure 2A**). The application of these cocktails on seeds of *P. ramosa* pv. oilseed rape allowed  
265 us to determine whether the effect observed with the complex supernatants was mainly due to  
266 the presence of these PGCs and not to other compounds produced by the bacteria.

267 The same levels of inhibition were observed with the different molecular cocktails as in  
268 the experiment with bacterial supernatants. Indeed, the cocktails mimicking the concentration  
269 of PGCs in the supernatants of complemented and the overproducing strains most inhibited  
270 the germination of *P. ramosa* pv. oilseed rape (**Figure 2B**). Thus, as observed with complex  
271 supernatants, the inhibition of *P. ramosa* germination is dependent on the composition of the  
272 PGCs and their relative concentrations (**Figure 2A and 2B**).

273 Furthermore, we wanted to determine the individual contribution of these PGCs to the  
274 inhibition of broomrape germination by testing five different concentrations of each PGC  
275 (**Figure 2C**). First, we performed this inhibition assays on the four previously used broomrape  
276 species. However, the presence of 0.33 % of methanol in the PGC solutions inhibited seed  
277 germination of *P. ramosa* pv. tobacco and *P. ramosa* pv. hemp (Data not shown). Contrariwise  
278 to what was observed with the bacterial supernatants (**Supplementary Figure 1**), the  
279 germination rate of *P. ramosa* pv. oilseed rape was more affected following the exposure to  
280 PGCs than *O. cumana* sunflower (two-way ANOVA showed a broomrape effect, p-value <  
281 0.001) (**Figure 2C**). Indeed, a reduction of more than 50 % of *O. cumana* germination was  
282 observed only where the seeds were exposed to 50  $\mu$ M of DAPG. Remarkably, MAPG did not  
283 affect the germination rate of *O. cumana*. On the contrary, the germination rate of *P. ramosa*  
284 pv. oilseed rape started to be affected by the addition of PGCs at 12.5  $\mu$ M. DAPG was the  
285 most effective PGC to disable broomrape germination with 100 % of inhibition at 25  $\mu$ M and  
286 50  $\mu$ M for *P. ramosa* pv. oilseed rape and 100 % inhibition at 50  $\mu$ M for *O. cumana* sunflower.  
287 Indeed, the estimated median lethal concentration (LC50) is the lowest for the DAPG for both  
288 broomrape species tested (20.0  $\mu$ M for *P. ramosa* pv. oilseed rape and 29.1  $\mu$ M for *O. cumana*  
289 (**Supplementary Figure 2**). At the end of the experiment, we recovered the seeds of *P.*  
290 *ramosa* treated with 50  $\mu$ M of the different PGCs and washed those 3 times with phosphate  
291 buffer to remove PGC traces. Then we added again the GR24 germination stimulant. We  
292 observed that the inhibition by the PGC is irreversible since none of the seed treated with PGC  
293 germinated. Moreover, for all PGCs except for DAPG, between 25  $\mu$ M and 50  $\mu$ M, the inhibition  
294 effects were associated with a brown coloration of the seeds or the radicles (**Supplementary**  
295 **Figure 3**).

296

### 297 **The inoculation of PGC-producing *Pseudomonas* reduced the infection of *P. ramosa* on** 298 ***Brassica napus***

299 As the DAPG showed the best inhibition of broomrape germination *in vitro*, we tested  
300 the application of DAPG (50  $\mu$ M and 250  $\mu$ M) or bacteria (F113 and  $\Delta$ *phlD*) on *Brassica napus*  
301 to reduce the infection by *P. ramosa* pv. oilseed rape in greenhouse conditions. We evaluated  
302 the developmental stage of *P. ramosa* using the development scale available in the  
303 **Supplementary Figure 4**. We observed a significant reduction (47%) of the number of *P.*

304 *ramosa* attached to the root of oilseed rape when F113 was inoculated (**Figure 3A**). This effect  
305 was not detected when the  $\Delta phlD$  mutant was inoculated. Interestingly, at the end of the  
306 experiment, we observed a reduction of the proportion of early stage infections (stage 1 and  
307 2; qualitative infection scale available in **Supplementary Figure 4**) in the condition inoculated  
308 with F113 or  $\Delta phlD$  compared to the control (**Figure 3B**). On the contrary, the application of  
309 DAPG at 50 or 250  $\mu\text{M}$  ( $v = 5\text{mL}$ ) did not affect the infection of *P. ramosa* (**Figure 3A and 3B**).  
310 We also measured the effect of the bacterial inoculation and the application of DAPG on the  
311 physiology of *Brassica napus*. We observed that the biomass of the root system was  
312 significantly lower than the control condition when F113 was inoculated (**Figure 4**).  
313 Conversely, the shoot biomass was significantly higher than the control condition when the  
314 DAPG was added (**Figure 4**). We also looked at the nutrition capacity of *B. napus* using an  
315 elemental profiling approach (i.e., ionic) to investigate potential switch of elements  
316 according to the treatments we applied. For all the tested conditions, we did not observe a  
317 main significant switch of the ion profile inside the shoots of *B. napus* (**Figure 5A and 5B**).  
318 However, the proportions of certain ions changed according to the treatment applied. On the  
319 one hand, the inoculation of F113 lead to a significant increase of sodium and a decrease of  
320 manganese quantity, whereas the mutant  $\Delta phlD$  was associated to a decrease of potassium  
321 (P) (**Figure 5C**). On the other hand, the addition of DAPG was associated to a significant  
322 increase of antimony (Sb), beryllium (Be) and a reduction of nickel (Ni) in rapeseed shoots  
323 (**Figure 5D**).

## 324 Discussion

325 PGC-producing *Pseudomonas* are well described for their capacity to protect different  
326 crop plants from the infection by plant pathogens. Their biocontrol activity has been shown to  
327 be dependent on the production of antimicrobial compounds, including DAPG. In this study,  
328 we assessed whether the biocontrol activity of such bacterial strains can be extended to the  
329 protection of crops towards parasitic plants. We focused on the model environmental  
330 *Pseudomonas*, *P. ogarae* F113, which is known to display different plant-beneficial properties  
331 including the production of DAPG [33, 40]

332 Except for TAPG whose bacterial production remains to be demonstrated, F113 is able  
333 to synthesize, in different amounts, a cocktail of PGCs composed of PG, MAPG and DAPG  
334 (**Figure 1B**). It is worth noting that the production and the proportion of PGCs are variable  
335 among *Pseudomonas* strains [41] and depend on many environmental factors such as carbon  
336 sources [23], bacterial lifestyle (e.g., planktonic or biofilm) [42] or composition of plant exudates  
337 [43, 44]. The introduction of the *phlD* gene on a low-copy plasmid in the *phlD* mutant ( $\Delta phlD$   
338 Comp.) and in the wild-type F113 strain (Over *phlD*) modified the production of PGCs, these  
339 strains accumulating more PG and MAPG in their supernatants than F113. The production of

340 different PGCs (as in the Over-*phlD* F113 derivative) leads to a stronger inhibitory effect on  
341 the germination of the different broomrapes tested (**Figure 1C**). We also confirmed these  
342 results using a cocktail of commercial PGCs in the same proportions (**Figure 2A and 2B**) and  
343 highlighted that each of the PGCs displayed a different inhibition capacity towards the  
344 germination of broomrapes (**Figure 2C**). Indeed, we showed that the DAPG provided the  
345 highest inhibition results. Islam and von Tiedemann (2011) tested the effect of DAPG and its  
346 derivatives on the zoosporogenesis and the motility of zoospores from *Plasmopara viticola* and  
347 *Aphanomyces cochlioides* [45]. They also observed that DAPG displayed the highest inhibitory  
348 effect compared to its derivatives. Similar results were observed on the mycelial growth of the  
349 plant pathogen *Pythium ultimum* [46]. Altogether, these results highlight the importance to  
350 consider the amount of the different precursors of DAPG produced by PGCs-producing  
351 *Pseudomonas* strains as they could also act as active compounds.

352 Although DAPG had been well described for its antimicrobial activity towards different  
353 kind of plant-pathogens (e.g., fungi, oomycetes) [22], its toxic effect on plants was also  
354 investigated on crop plants and appear to be associated to its concentration and the plant  
355 species [34]. A recent study analyzed the impact of DAPG at 50  $\mu\text{g}\cdot\text{mL}^{-1}$  (equivalent to 240  
356  $\mu\text{M}$ ) on the germination rate of 69 wheat cultivars and showed strong differences according to  
357 cultivars [47]. This is in line with our results where the inhibition of germination was dependent  
358 on the concentration of DAPG and also different according to the broomrapes species and  
359 pathovar. Chae and colleagues (2020) identified several genes implicated in the sensitivity of  
360 *Arabidopsis thaliana* to exposure to DAPG [48]. These genes are involved in different  
361 metabolic pathways such as the tryptophan and monocarboxylic acid metabolisms and iron  
362 management [48]. The development of molecular tools to modify broomrape genomes would  
363 provide new insights on the molecular determinants responsible for their resistance and  
364 sensitivity towards PGCs.

365 The mode of action of DAPG and its derivatives at cellular level remains elusive. In our  
366 study, we observed a brown coloration of the broomrape radicles treated with PGCs  
367 (**Supplementary figure 3**). This coloration had previously been observed on tomato seedlings  
368 following the addition of 50  $\mu\text{M}$  of DAPG [31]. At cellular levels, the sensitivity to DAPG was  
369 correlated with disruption of F-actin cytoskeleton in *A. cochlioides* hyphae [49] and with  
370 alterations of major physiological functions in yeast including the regulation of cellular  
371 responses to reactive oxygen stress and cell homeostasis [50]. Thus, the brown coloration of  
372 root tissues could be attributed to cell wall disorganization [49], impairment of mitochondrial  
373 functions [50, 51] and induction of oxidative burst [50]. Furthermore, in our experiment, the  
374 damage caused by the DAPG on broomrape seeds was irreversible since none of the  
375 broomrape seeds treated with DAPG were able to germinate after several washing steps and  
376 the addition of the GR24 germination inductor.

377 To determine if these compounds and PGCs-producing *Pseudomonas* strains are good  
378 candidates to prevent the infection of broomrapes, we performed greenhouse experiments  
379 with a natural soil which was infected with broomrape seeds. We used this soil to assess  
380 whether a bacterial inoculant or the pure DAPG can prevent the infection of oilseed rape by  
381 broomrapes. We observed that the wild type F113 was able to significantly reduce the number  
382 of broomrapes bound to *B. napus* roots compared to the mutant impaired in DAPG production.  
383 Interestingly, the number of broomrapes associated with new host infection (stage 1 and 2) in  
384 the condition where the bacteria were inoculated was significantly lower than in the control  
385 condition. Thus, the reduction of the infection is delayed and did not start immediately after the  
386 inoculation of the bacterial strains. This lag phase could be interpreted as the time needed for  
387 the bacterial inoculant to establish itself within the soil and/or root microbiome, and/or to  
388 produce DAPG in sufficient amounts. Bacteria can exert, as well, an indirect positive activity  
389 on oilseed rape leading to a decreased sensitivity to broomrape infection as cited previously  
390 by Cartry *et al.* [5]. Moreover, several reports showed that DAPG act as a signaling molecule  
391 inducing the plant systemic resistance [32] or the expression of its own biosynthetic genes  
392 [26]. Thus, the enrichment of the *B. napus* rhizo-microbiota with PGC-producing  
393 pseudomonads could stimulate other PGC-producing strains already present in the  
394 rhizosphere, leading to an increase of PGC concentrations in soil, thereby leading to  
395 detrimental effects on broomrape germination.

396 In addition, the inoculation of F113 leads to a decrease of the root system biomass of  
397 *B. napus*. It has been shown that the inoculation of PGC-producing *Pseudomonas* was linked  
398 to a decrease of the root length in *Arabidopsis thaliana* and other crop plants [31, 33, 52]. Thus,  
399 PGCs producing strains could limit the germination of broomrapes by two modes of action.  
400 The first one can be direct via the production of DAPG that inhibit the parasite seed germination  
401 whereas the second affects the root length of the host plant that *in fine* decreases the  
402 probability of contact between the host plant roots and broomrape seeds within the rhizosphere  
403 soil.

404 Conversely, the application of DAPG did not limit the infection of *P. ramosa* on *B. napus*  
405 roots. The DAPG applied may have not only specifically targeted the broomrape seeds but  
406 also interacted with the resident soil/root microbiomes as well as the oilseed plant. Thus, the  
407 amount of DAPG targeting the broomrape seeds might be insufficient to deliver a significant  
408 reduction of *P. ramosa* infection. Moreover, the soil chemical properties could impact the  
409 efficiency of DAPG inhibition. However, the application of the DAPG appeared to have an  
410 effect on the host plant by increasing oilseed rape shoot biomass (**Figure 4**). This gain of  
411 biomass was not associated in a significant shift in ion profile (**Figure 5**). Shoot accumulation  
412 of sodium (p-value < 0.05 for F113 treatment and < 0.1 for DAPG 50  $\mu$ M treatment) appears  
413 to be linked to less parasitism. Sodium accumulation is generally considered as toxic for plants



414 depending on plant species [53]. In our study, the accumulation of sodium does not affect the  
415 plant host but is correlated to a reduction of *P. ramosa* infection. Bacterial inoculation with  
416 *Pseudomonas* or *Azospirillum* was rather associated to a decrease of sodium in rapeseed leaf  
417 when exposed to harmful effects of salt stress [54]. Thus, improvement of sodium uptake in  
418 the host by DAPG-producing bacteria could be another factor associated to broomrape  
419 protection. As the nutrient flux from the host plant to the parasite is driven by an osmotic  
420 pressure differential between them [55], we hypothesize that the increase of sodium content  
421 in the host may reduce the level of nutrient uptake by the parasite and may impact its growth.  
422 Thus, sodium accumulation could be an interesting factor to study on oilseed rape cultivars in  
423 response to biocontrol agents.

424 Here, we showed that PGCs, and more specifically DAPG, combined different direct  
425 and indirect effects to protect oilseed rape against broomrape. DAPG and its derivatives could  
426 be interesting bioherbicides produced by *Pseudomonas* for preventing parasitic plant  
427 infestation as we did not observe any toxicity towards the host plant. The soil and root  
428 microbiome compositions were previously associated to natural suppressiveness towards  
429 parasitic weeds. Indeed, several studies claimed that the suppressiveness of *Orobancha* sp.  
430 as well as *Striga hermonthica* is associated with the presence of specific bacterial taxa,  
431 including *Pseudomonas* [11, 56]. Since, PGC-producing *Pseudomonas* can be followed in soil  
432 via qPCR approaches [57], determining the correlation between the community of PGC-  
433 producing *Pseudomonas* and the level of parasitic plant infection would bring new insights on  
434 the ecological role of these bacteria in suppressive soils.

435

## 436 **Conclusion**

437 This study reinforces the interest of using microorganisms as natural solutions to  
438 regulate populations of pests and plant pathogens [58]. Indeed, this study is the first to discover  
439 and demonstrate the inhibitory effect of DAPG on parasitic plant germination, expanding the  
440 repertoire of plant-beneficial properties of environmental pseudomonads. Furthermore, we  
441 evidenced that PGCs produced by *P. ogarae* are the main and even the only compounds, that  
442 irreversibly inhibit the germination of broomrape species / pathovars tested. We obtained  
443 promising results during the experiments carried out in natural soil in greenhouse condition.  
444 Indeed, the inoculation of *P. ogarae* halved the infection of *P. ramosa* on its host plant, *Brassica*  
445 *napus*. The present work significantly expands our knowledge about the role that these plant-  
446 beneficial *Pseudomonas* play in the environment and provides new direction for the  
447 development of natural bioherbicides to ward off parasitic plant infection.

448

## 449 **Author contributions**

450 TL, JV, MR and CPC conceived the research and designed the experiment.

451 TL, MR, FG, SP, FWD and CPC performed the research.

452 TL, JV, FWD and CPC analyzed data.

453 TL, JV, FWD, CPC wrote the paper.

454 CPC found financial supports to this work.

455

## 456 **Acknowledgements**

457 We thank the research team US2B of Nantes and more specifically Jean-Bernard  
458 Pouvreau for providing the broomrape seeds. We thank the company RAGT for providing  
459 seeds of the oilseed rape cultivars. We thank members of the Rhizo team of the Microbial  
460 Ecology unit at University Lyon 1 for their help in enumeration of broomrapes bound to *B.*  
461 *napus* roots in greenhouse. We are most grateful to PLATIN' (Plateau d'Isotopie de  
462 Normandie) core facility for all element and isotope analysis used in this study. The platform  
463 "Serre" of FR BioEEnViS (University Lyon 1) was used to carry out this work.

464

## 465 **Funding**

466 This research and TL were supported by a grant from the French national research agency  
467 "Ecophyto Maturation" (ANR-19-ECOM-0002 WeedsBiocontrol) and by a maturation grant  
468 from the Pulsalys Technology Transfer Acceleration Company. JV was supported by the Swiss  
469 National Centre of Competence in Research (NCCR) Microbiomes (no. 51NF40\_180575).

470



## 471 References

- 472 1. Parker C. Parasitic weeds: A world challenge. *Weed Science* 2012; **60**: 269–276.
- 473 2. Bennett JR, Mathews S. Phylogeny of the parasitic plant family *Orobanchaceae* inferred from  
474 phytochrome A. *Am J Bot* 2006; **93**: 1039–1051.
- 475 3. Joel DM. The new nomenclature of *Orobanche* and *Phelipanche*. *Weed Research* 2009; **49**:  
476 6–7.
- 477 4. Westwood JH. The physiology of the established parasite–host association. In: Joel DM,  
478 Gressel J, Musselman LJ (eds). *Parasitic Orobanchaceae: Parasitic Mechanisms and Control*  
479 *Strategies*. 2013. Springer, Berlin, Heidelberg, pp 87–114.
- 480 5. Cartry D, Steinberg C, Gibot-Leclerc S. Main drivers of broomrape regulation. A review. *Agron*  
481 *Sustain Dev* 2021; **41**: 17.
- 482 6. Mutuku JM, Cui S, Yoshida S, Shirasu K. *Orobanchaceae* parasite–host interactions. *New*  
483 *Phytolog* 2021; **230**: 46–59.
- 484 7. Aliche EB, Screpanti C, De Mesmaeker A, Munnik T, Bouwmeester HJ. Science and  
485 application of strigolactones. *New Phytol* 2020; **227**: 1001–1011.
- 486 8. Haring SC, Flessner ML. Improving soil seed bank management. *Pest Manag Sci* 2018; **74**:  
487 2412–2418.
- 488 9. Rubiales D, Alcántara C, Pérez-de-Luque A, Gil J, Sillero J. Infection of chickpea (*Cicer*  
489 *arietinum*) by crenate broomrape (*Orobanche crenata*) as influenced by sowing date and  
490 weather conditions. *dx.doi.org* 2003; **23**.
- 491 10. Huet S, Pouvreau J-B, Delage E, Delgrange S, Marais C, Bahut M, et al. Populations of the  
492 parasitic plant *Phelipanche ramosa* influence their seed microbiota. *Front Plant Sci* 2020; **11**:  
493 1075.
- 494 11. Kawa D, Thiombiano B, Shimels M, Taylor T, Walmsley A, Vahldick HE, et al. The soil  
495 microbiome reduces *Striga* infection of sorghum by modulation of host-derived signaling  
496 molecules and root development. 2022. bioRxiv.
- 497 12. Martinez L, Pouvreau J-B, Montiel G, Jestin C, Delavault P, Simier P, et al. Soil microbiota  
498 promotes early developmental stages of *Phelipanche ramosa* L. Pomel during plant  
499 parasitism on *Brassica napus* L. *Plant Soil* 2022.
- 500 13. Masteling R, Lombard L, de Boer W, Raaijmakers JM, Dini-Andreote F. Harnessing the  
501 microbiome to control plant parasitic weeds. *Curr Opin Microbiol* 2019; **49**: 26–33.
- 502 14. Hasannejad S, Zad SJ, Alizade HM, Rahymian H. The effects of *Fusarium oxysporum* on  
503 broomrape (*Orobanche egyptiaca*) seed germination. *Commun Agric Appl Biol Sci* 2006; **71**:  
504 1295–1299.
- 505 15. Dadon T, Nun NB, Mayer AM. A factor from *Azospirillum brasilense* inhibits germination and  
506 radicle growth of *Orobanche aegyptiaca*. *Isr J Plant Sci* 2004; **52**: 83–86.
- 507 16. Balthazar C, Joly DL, Filion M. Exploiting beneficial *Pseudomonas* spp. for cannabis  
508 production. *Front Microbiol* 2021; **12**: 833172.
- 509 17. Silby MW, Winstanley C, Godfrey SAC, Levy SB, Jackson RW. *Pseudomonas* genomes:  
510 diverse and adaptable. *FEMS Microbiol Rev* 2011; **35**: 652–680.
- 511 18. Haas D, Défago G. Biological control of soil-borne pathogens by fluorescent pseudomonads.  
512 *Nat Rev Microbiol* 2005; **3**: 307–319.
- 513 19. Loper JE, Hassan KA, Mavrodi DV, Davis EW, Lim CK, Shaffer BT, et al. Comparative  
514 genomics of plant-associated *Pseudomonas* spp.: insights into diversity and inheritance of  
515 traits involved in multitrophic interactions. *PLoS Genet* 2012; **8**: e1002784.
- 516 20. Almario J, Bruto M, Vacheron J, Prigent-Combaret C, Moëgne-Loccoz Y, Muller D.  
517 Distribution of 2,4-diacetylphloroglucinol biosynthetic genes among the *Pseudomonas* spp.  
518 reveals unexpected polyphyletism. *Front Microbiol* 2017; **8**: 1218.
- 519 21. Achkar J, Xian M, Zhao H, Frost JW. Biosynthesis of phloroglucinol. *J Am Chem Soc* 2005;  
520 **127**: 5332–5333.

- 521 22. Biessy A, Fillion M. Phloroglucinol derivatives in plant-beneficial *Pseudomonas* spp.:  
522 biosynthesis, regulation, and functions. *Metabolites* 2021; **11**: 182.
- 523 23. Shanahan P, O'sullivan DJ, Simpson P, Glennon JD, O'gara F. Isolation of 2,4-  
524 diacetylphloroglucinol from a fluorescent pseudomonad and investigation of physiological  
525 parameters influencing its production. *Appl Environ Microbiol* 1992; **58**: 353–358.
- 526 24. Yu X-Q, Yan X, Zhang M-Y, Zhang L-Q, He Y-X. Flavonoids repress the production of  
527 antifungal 2,4-DAPG but potentially facilitate root colonization of the rhizobacterium  
528 *Pseudomonas fluorescens*. *Environ Microbiol* 2020; **22**: 5073–5089.
- 529 25. Brodhagen M, Henkels MD, Loper JE. Positive autoregulation and signaling properties of  
530 pyoluteorin, an antibiotic produced by the biological control organism *Pseudomonas*  
531 *fluorescens* Pf-5. *Appl Environ Microbiol* 2004; **70**: 1758–1766.
- 532 26. Maurhofer M, Baehler E, Notz R, Martinez V, Keel C. Cross talk between 2,4-  
533 diacetylphloroglucinol-producing biocontrol pseudomonads on wheat roots. *Appl Environ*  
534 *Microbiol* 2004; **70**: 1990–1998.
- 535 27. Combes-Meynet E, Pothier JF, Moënne-Loccoz Y, Prigent-Combaret C. The *Pseudomonas*  
536 secondary metabolite 2,4-diacetylphloroglucinol is a signal inducing rhizoplane expression of  
537 *Azospirillum* genes involved in plant-growth promotion. *Mol Plant Microbe Interact* 2011; **24**:  
538 271–284.
- 539 28. Iavicoli A, Boutet E, Buchala A, Métraux J-P. Induced systemic resistance in *Arabidopsis*  
540 *thaliana* in response to root inoculation with *Pseudomonas fluorescens* CHA0. *Mol Plant*  
541 *Microbe Interact* 2003; **16**: 851–858.
- 542 29. Bakker PAHM, Pieterse CMJ, van Loon LC. Induced systemic resistance by fluorescent  
543 *Pseudomonas* spp. *Phytopathology* 2007; **97**: 239–243.
- 544 30. Phillips DA, Fox TC, King MD, Bhuvaneshwari TV, Teuber LR. Microbial products trigger amino  
545 acid exudation from plant roots. *Plant Physiol* 2004; **136**: 2887–2894.
- 546 31. Brazelton JN, Pfeufer EE, Sweat TA, Gardener BBM, Coenen C. 2,4-Diacetylphloroglucinol  
547 alters plant root development. *Mol Plant Microbe Interact* 2008; **21**: 1349–1358.
- 548 32. Weller DM, Mavrodi DV, van Pelt JA, Pieterse CMJ, van Loon LC, Bakker PAHM. Induced  
549 systemic resistance in *Arabidopsis thaliana* against *Pseudomonas syringae* pv. tomato by  
550 2,4-diacetylphloroglucinol-producing *Pseudomonas fluorescens*. *Phytopathology* 2012; **102**:  
551 403–412.
- 552 33. Vacheron J, Desbrosses G, Renoud S, Padilla R, Walker V, Muller D, et al. Differential  
553 contribution of plant-beneficial functions from *Pseudomonas kilonensis* F113 to root system  
554 architecture alterations in *Arabidopsis thaliana* and *Zea mays*. *Mol Plant Microbe Interact*  
555 2018; **31**: 212–223.
- 556 34. Keel C. Suppression of root diseases by *Pseudomonas fluorescens* CHA0: Importance of the  
557 bacterial secondary metabolite 2,4-diacetylphloroglucinol. *Mol Plant Microbe Interact* 1992; **5**:  
558 4.
- 559 35. Khan F, Tabassum N, Bamunuarachchi NI, Kim Y-M. Phloroglucinol and its derivatives:  
560 antimicrobial properties toward microbial pathogens. *J Agric Food Chem* 2022; **70**: 4817–  
561 4838.
- 562 36. King EO, Ward MK, Raney DE. Two simple media for the demonstration of pyocyanin and  
563 fluorescin. *J Lab Clin Med* 1954; **44**: 301–307.
- 564 37. Pouvreau J-B, Gaudin Z, Auger B, Lechat M-M, Gauthier M, Delavault P, et al. A high-  
565 throughput seed germination assay for root parasitic plants. *Plant Methods* 2013; **9**: 32.
- 566 38. El Zembrany H, Cortet J, Peter Lutz M, Chabert A, Baudoin E, Haurat J, et al. Field survival of  
567 the phytostimulator *Azospirillum lipoferum* CRT1 and functional impact on maize crop,  
568 biodegradation of crop residues, and soil faunal indicators in a context of decreasing nitrogen  
569 fertilisation. *Soil Biol Biochem* 2006; **38**: 1712–1726.

- 570 39. Lurthy T, Cantat C, Jeudy C, Declerck P, Gallardo K, Barraud C, et al. Impact of bacterial  
571 siderophores on iron status and ionome in pea. *Front Plant Sci* 2020; **11**: 730.
- 572 40. Redondo-Nieto M, Barret M, Morrissey JP, Germaine K, Martínez-Granero F, Barahona E, et  
573 al. Genome sequence of the biocontrol strain *Pseudomonas fluorescens* F113. *J Bacteriol*  
574 2012; **194**: 1273–1274.
- 575 41. Duffy BK, Défago G. Environmental factors modulating antibiotic and siderophore  
576 biosynthesis by *Pseudomonas fluorescens* biocontrol strains. *Appl Environ Microbiol* 1999;  
577 **65**: 2429–2438.
- 578 42. Rieusset L, Rey M, Muller D, Vacheron J, Gerin F, Dubost A, et al. Secondary metabolites  
579 from plant-associated *Pseudomonas* are overproduced in biofilm. *Microb Biotechnol* 2020;  
580 **13**: 1562–1580.
- 581 43. de Werra P, Huser A, Tabacchi R, Keel C, Maurhofer M. Plant- and microbe-derived  
582 compounds affect the expression of genes encoding antifungal compounds in a  
583 pseudomonad with biocontrol activity. *Appl Environ Microbiol* 2011; **77**: 2807–2812.
- 584 44. Rieusset L, Rey M, Gerin F, Wisniewski-Dyé F, Prigent-Combaret C, Comte G. A cross-  
585 metabolomic approach shows that wheat interferes with fluorescent *Pseudomonas*  
586 physiology through its root metabolites. *Metabolites* 2021; **11**: 84.
- 587 45. Islam MT, von Tiedemann A. 2,4-Diacetylphloroglucinol suppresses zoosporegenesis and  
588 impairs motility of Peronosporomycete zoospores. *World J Microbiol Biotechnol* 2011; **27**:  
589 2071–2079.
- 590 46. de Souza JT, Arnould C, Deulvot C, Lemanceau P, Gianinazzi-Pearson V, Raaijmakers JM.  
591 Effect of 2,4-diacetylphloroglucinol on *pythium*: cellular responses and variation in sensitivity  
592 among propagules and species. *Phytopathology* 2003; **93**: 966–975.
- 593 47. Yang M, Thomashow LS, Weller DM. Evaluation of the phytotoxicity of 2,4-  
594 diacetylphloroglucinol and *Pseudomonas brassicacearum* Q8r1-96 on different wheat  
595 cultivars. *Phytopathology* 2021; **111**: 1935–1941.
- 596 48. Chae D-H, Kim D-R, Cho G, Moon S, Kwak Y-S. Genome-wide investigation of 2,4-  
597 diacetylphloroglucinol protection genes in *Arabidopsis thaliana*. *Mol Plant-Microbe Interact*  
598 2020; **33**: 1072–1079.
- 599 49. Islam MT, Fukushi Y. Growth inhibition and excessive branching in *Aphanomyces cochlioides*  
600 induced by 2,4-diacetylphloroglucinol is linked to disruption of filamentous actin cytoskeleton  
601 in the hyphae. *World J Microbiol Biotechnol* 2010; **26**: 1163–1170.
- 602 50. Kwak Y-S, Han S, Thomashow LS, Rice JT, Paulitz TC, Kim D, et al. *Saccharomyces*  
603 *cerevisiae* genome-wide mutant screen for sensitivity to 2,4-diacetylphloroglucinol, an  
604 antibiotic produced by *Pseudomonas fluorescens*. *Appl Environ Microbiol* 2011; **77**: 1770–  
605 1776.
- 606 51. Troppens DM, Dmitriev RI, Papkovsky DB, O’Gara F, Morrissey JP. Genome-wide  
607 investigation of cellular targets and mode of action of the antifungal bacterial metabolite 2,4-  
608 diacetylphloroglucinol in *Saccharomyces cerevisiae*. *FEMS Yeast Res* 2013; **13**: 322–334.
- 609 52. De Leij FA, Dixon-Hardy JE, Lynch JM. Effect of 2,4-diacetylphloroglucinol-producing and  
610 non-producing strains of *Pseudomonas fluorescens* on root development of pea seedlings in  
611 three different soil types and its effect on nodulation by *Rhizobium*. *Biol Fertil Soils* 2002; **35**:  
612 114–121.
- 613 53. Kronzucker HJ, Coskun D, Schulze LM, Wong JR, Britto DT. Sodium as nutrient and toxicant.  
614 *Plant Soil* 2013; **369**: 1–23.
- 615 54. Farhangi-Abriz S, Tavasolee A, Ghassemi-Golezani K, Torabian S, Monirifar H, Rahmani HA.  
616 Growth-promoting bacteria and natural regulators mitigate salt toxicity and improve rapeseed  
617 plant performance. *Protoplasma* 2020; **257**: 1035–1047.
- 618 55. Shen H, Ye W, Hong L, Huang H, Wang Z, Deng X, et al. Progress in parasitic plant biology:  
619 host selection and nutrient transfer. *Plant Biol (Stuttg)* 2006; **8**: 175–185.

- 620 56. Zermane N, Souissi T, Kroschel J, Sikora R. Biocontrol of broomrape (*Orobanche crenata*  
621 Forsk. and *Orobanche foetida* Poir. ) by *Pseudomonas fluorescens* isolate Bf7-9 from the faba  
622 bean rhizosphere. *Biocontrol Sci Technol* 2007; **17**: 483–497.
- 623 57. Almario J, Moënne-Loccoz Y, Muller D. Monitoring of the relation between 2,4-  
624 diacetylphloroglucinol-producing *Pseudomonas* and *Thielaviopsis basicola* populations by  
625 real-time PCR in tobacco black root-rot suppressive and conducive soils. *Soil Biol Biochem*  
626 2013; **57**: 144–155.
- 627 58. Vurro M. Are root parasitic broomrapes still a good target for bioherbicide control? *Pest Manag*  
628 *Sci* 2023.

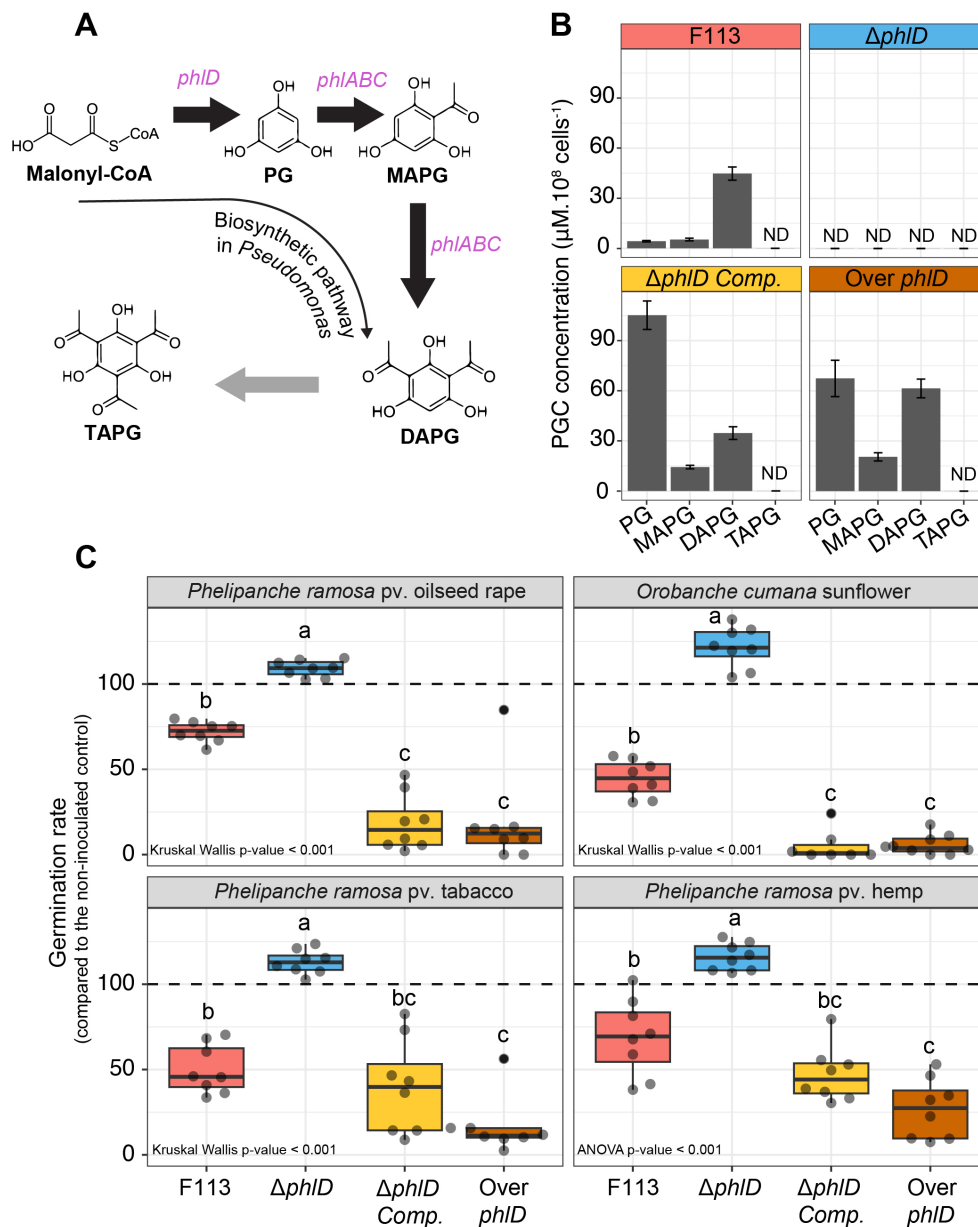

629  
630

631 **Figure 1: Impact of bacterial supernatants of PGC-producing *Pseudomonas* on the**  
 632 **germination rate of different broomrapes. A:** Biosynthetic pathway of the DAPG in  
 633 *Pseudomonas* cells (according to Biessy and Filion, 2021). The genes involved in the different  
 634 transformation steps are written in italic. **B:** Quantification of Phloroglucinol (PG),  
 635 monoacetylphloroglucinol (MAPG), diacetylphloroglucinol (DAPG) and triacetylphloroglucinol  
 636 (TAPG) in the bacterial supernatants of *Pseudomonas ogarae* F113 and its mutant derivatives:  
 637 *ΔphID* (mutant impaired in the production of DAPG); *ΔphID* Comp. (complemented mutant  
 638 strain overproducing PG) and Over *ΔphID* (DAPG and PG overproducing strain). Error bars  
 639 correspond to the standard deviation; ND: Not detected. **C:** Impact of these supernatants on  
 640 the germination capacity of different *P. ramosa* pathovars and *O. cumana* *in vitro*. The  
 641 supernatants as well as the control condition were supplemented with 1 µM of the germination  
 642 stimulant (GR24). Results are expressed as percentage of germination of the non-inoculated  
 643 ABm medium control. Statistical differences were assessed by ANOVA and Kruskal-Wallis test  
 644 using a Bonferroni correction and are indicated with letters. The horizontal lines indicate the  
 645 interquartile range with the center representing the median.



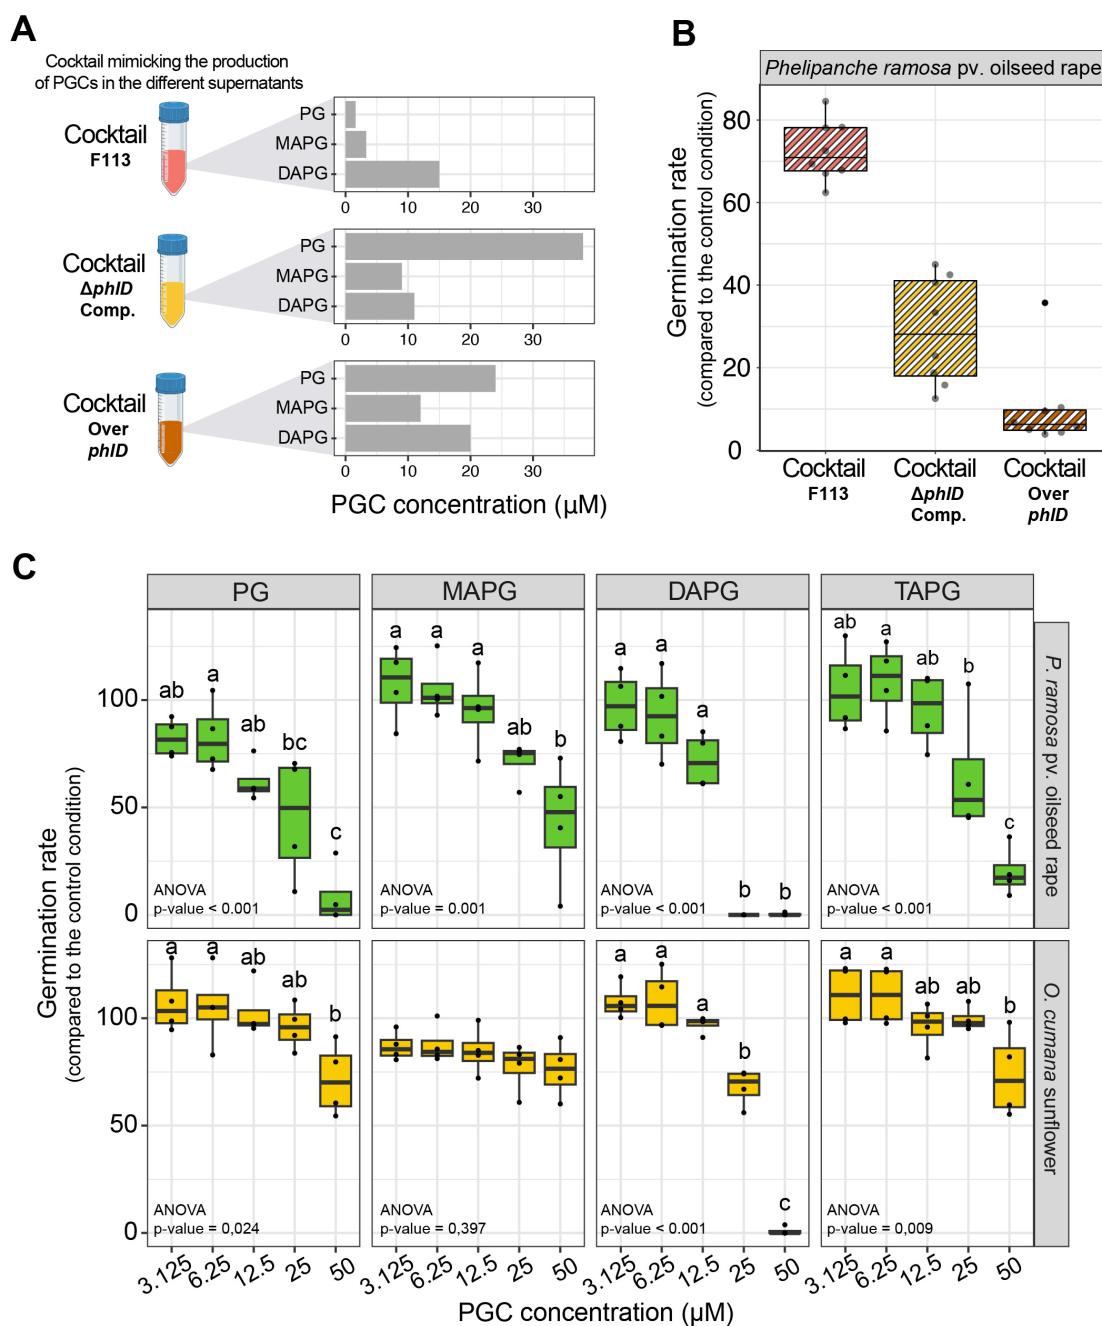

646  
647  
648  
649  
650  
651  
652  
653  
654  
655  
656  
657  
658  
659  
660

**Figure 2: Individual contribution of the different PGCs to the inhibition of the germination of *P. ramosa* pv. oilseed rape and *O. cumana* sunflower.** **A:** Quantification of the pure PGCs added into the different cocktails mimicking the concentration detected in the bacterial supernatants. PG: Phloroglucinol; MAPG: monoacetylphloroglucinol; DAPG: Diacetylphloroglucinol; TAPG: Triacetylphloroglucinol. **B:** Effect of the PGCs cocktails on the germination rate of *P. ramosa* pv oilseed rape. **C:** Impact of PG, MAPG, DAPG and TAPG on the germination capacity of different *P. ramosa* pv. oilseed rape and *O. cumana* sunflower *in vitro*. In all the conditions, broomrape seed germination was induced by adding the germination stimulant GR24 (1  $\mu$ M). Results are expressed as a percentage of germination of the non-inoculated methanol control. Statistical differences were assessed by ANOVA and Kruskal-Wallis test using a Bonferroni correction and are indicated with letters. The horizontal lines indicate the interquartile range with the center representing the median. This experiment was repeated four times independently.

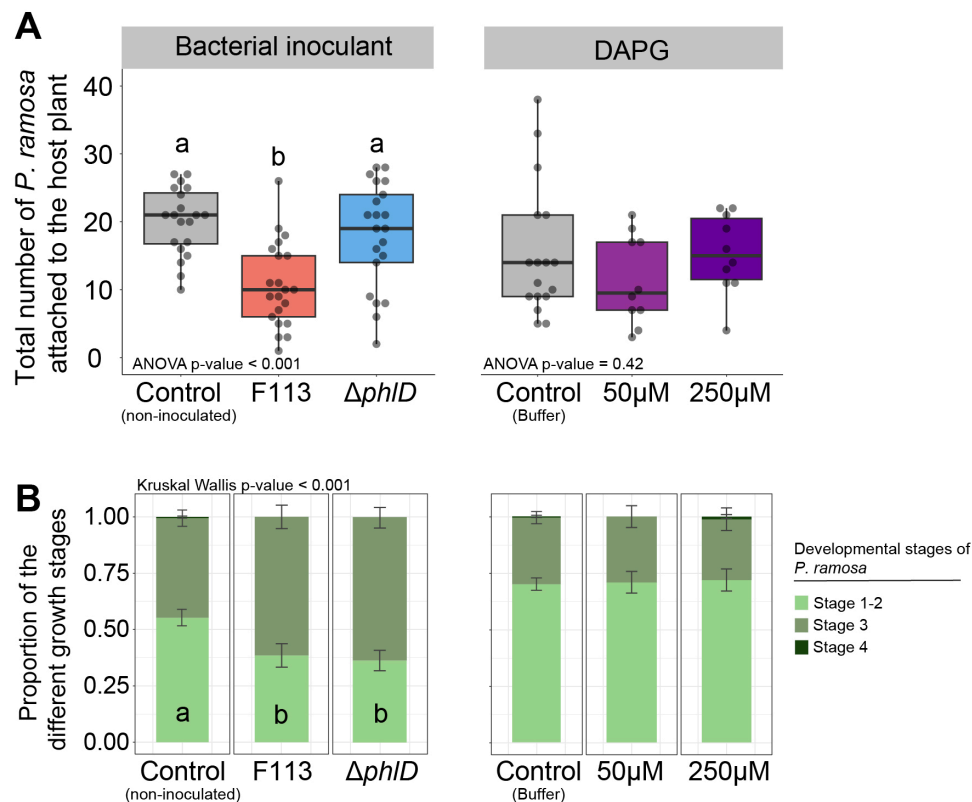

661  
662  
663  
664  
665  
666  
667  
668  
669  
670  
671  
672  
673  
674  
675  
676  
677  
678

**Figure 3: Impact of the inoculation of PGC-producing *Pseudomonas* and pure DAPG on the infection level by *P. ramosa* pv. oilseed rape on *Brassica napus* in greenhouse conditions. **A:** Evaluation of the number of attached *P. ramosa* on the root system of *Brassica napus* after 50 days in the greenhouse. Different treatments were applied: bacterial inoculants (F113 and  $\Delta phlD$  impaired in the production of DAPG, approximately five mL per pot of solutions at  $2.10^6$  bacteria.mL<sup>-1</sup>) and DAPG application (five mL of pure DAPG at 50 $\mu$ M or 250 $\mu$ M). The control condition of the bacterial inoculant experiment corresponds to the application of 5 ml with MgSO<sub>4</sub> 10 mM while in the DAPG experiment, the control corresponds to the application of 5 ml with phosphate buffer supplemented with 1.25% of methanol. This experiment was performed in a mixture containing natural soil artificially infested with approximately 300 *P. ramosa* seeds per liter of soil. **B:** Proportion of broomrapes attached to the root of *B. napus* according to their developmental stage. The developmental stage of *P. ramosa* was estimated according to the developmental scale available in **Supplementary Figure 4**. Statistical differences are indicated with letters (ANOVA and Fisher's LSD tests,  $p < 0.05$ ). The horizontal lines indicate the interquartile range with the center representing the median.**



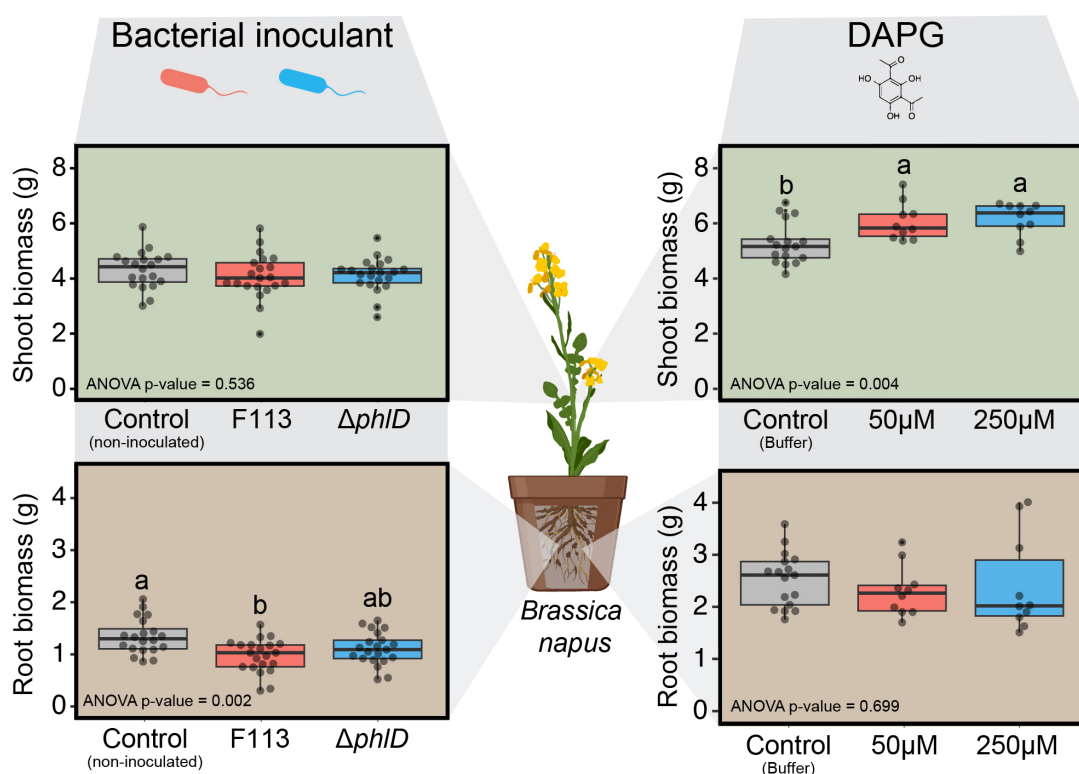

679  
680  
681  
682  
683  
684  
685  
686  
687  
688  
689  
690

**Figure 4: Effect of the inoculation of bacteria and the application of DAPG on the root and shoot biomasses of *Brassica napus*.** We measured for all the tested conditions the shoot and root biomasses of *Brassica napus* 50 days after sowing. The control condition of the bacterial inoculant experiment corresponds to the application of 5 ml with  $MgSO_4$  10 mM. In the DAPG experiment, the control corresponds to the application of 5 ml with phosphate buffer supplemented with 1.25 % of methanol. The brown background of the boxplots corresponds to the root biomass data while the green background is associated with shoot biomass data. Statistical differences are indicated with letters (ANOVA and Fisher's LSD tests,  $p < 0.05$ ). The horizontal lines indicate the interquartile range with the center representing the median.

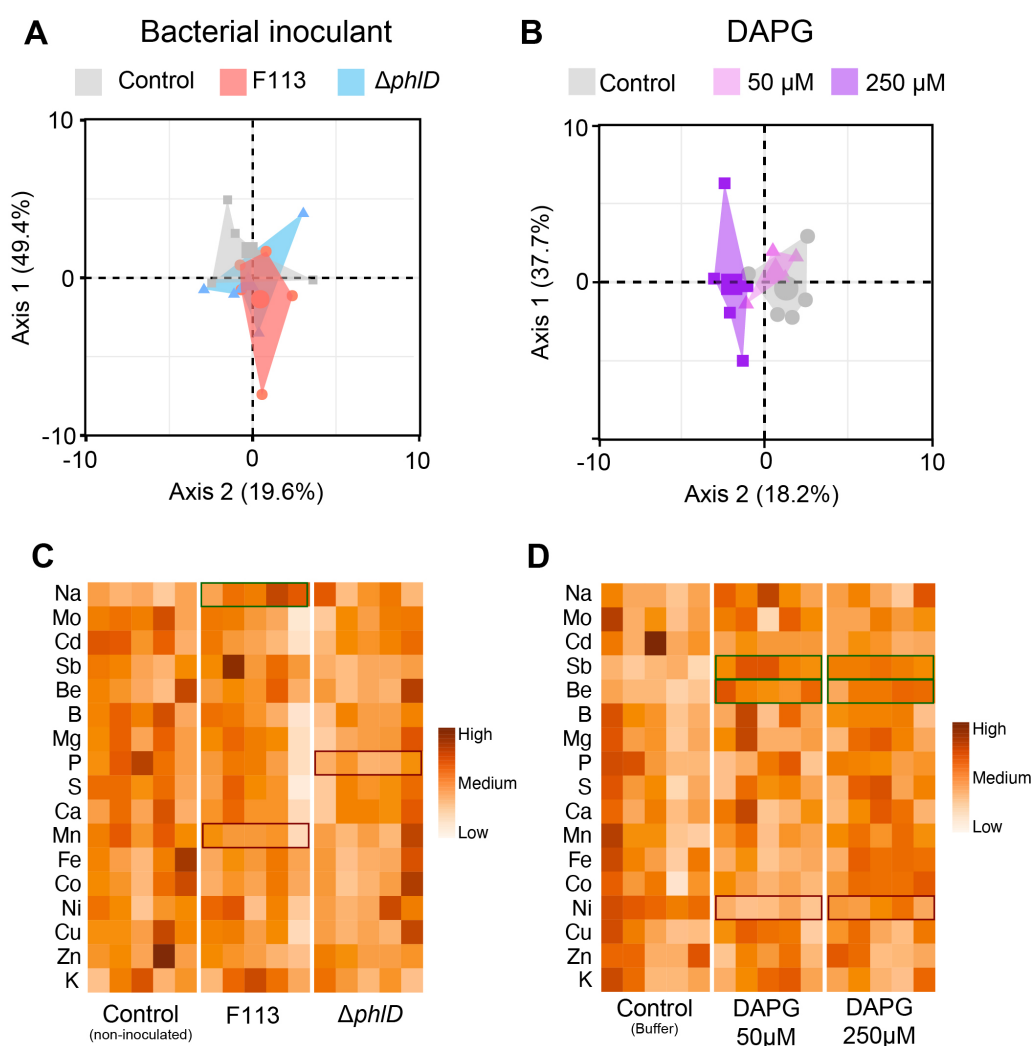

691  
692  
693  
694  
695  
696  
697  
698  
699  
700  
701

**Figure 5: Impact of the bacterial inoculation and the application of DAPG on the ion profile of the shoot of *Brassica napus*.** **A** and **B**: Principal component analysis of the element composition of the shoot of *Brassica napus* according to the different treatments applied (bacterial inoculants (**A**) and DAPG treatments (**B**)). **C** and **D** Heatmap showing the elemental profile of the different conditions. Significant differences between treatments and control were obtained with Student's t-test. When Student's t-test assumptions were not met, a Welch t-test was performed. \*p-value < 0.05, \*\*p-value < 0.01. The detailed data are available in **Supplementary Table 2** and **3**.
